# Supplementary material for: KMT1/Suv39 methyltransferase family regulates peripheral heterochromatin tethering via histone and non-histone protein methylations
Source: bioRxiv or medRxiv preprint supplement (doi:10.1101/240952), 2019-01-24
Supplement: Supplementary file [file 240952-8.pdf]

# Euchromatic histone methyltransferases regulate peripheral heterochromatin tethering via histone and non-histone protein methylations

Alhad Ashok Ketkar<sup>1,5</sup>, Radhika Arasala Rao<sup>1,3,5</sup>, Neelam Kedia<sup>1</sup>, Febina Ravindran<sup>1</sup>, Vairavan Lakshmanan<sup>2,3</sup>, Pankaj Kumar<sup>1</sup>, Abhishek Mohanty<sup>1</sup>, Shilpa Dilip Kumar<sup>2</sup>, Sufi O Raja<sup>2</sup>, Akash Gulyani<sup>2</sup>, ChandraPrakash Chaturvedi<sup>5</sup>, Marjorie Brand<sup>4</sup>, Dasaradhi Palakodeti<sup>2</sup>, Shravanti Rampalli<sup>1\*</sup>

## Wt. LMNB1Sequence

ATGGCGACTGCGACCCCGTGCCGCCGCGGATGGGCAGCCGCGCTGGCGGCCCCACCACGCCGCTGAGC  
C  
CCACGCGCCTGTTCGCGGCTCCAGGAGAAGGAGGAGCTGCGCGAGCTCAATGACCGGCTGGCGGTGTACA  
T  
CGACAAGGTGCGCAGCCTGGAGACGGAGAACAGCGCGCTGCAGCTGCAGGTGACGGAGCGCGAGGAGGT  
G  
CGCGGCCGCTGAGCTCACCGGCTCAAGGCGCTCTACGAGACCGAGCTGGCCGACGCGCGACGCGCGCTC  
G  
ACGACACGGCCCGGAGCGCGCCAAGCTGCAGATCGAGCTGGGCAAGTGCAAGGCGGAACACGACCAGC  
T  
GCTCCTCAACTATGCTAAGAAGGAATCTGATCTTAATGGCGCCAGATCAAGCTTCGAGAATATGAAGC  
A  
GCACTGAATTTCGAAAGATGCAGCTCTTGCTACTGCACTTGGTGACAAAAAAGTTTAGAGGGAGATTTG  
G  
AGGATCTGAAGGATCAGATTGCCAGTTGGAAGCCTCCTTAGCTGCAGCCAAAAACAGTTAGCAGATG  
A  
AACTTTACTTAAAGTAGATTTGGAGAATCGTTGTCAGAGCCTTACTGAGGACTTGGAGTTTCGCAAAAG  
C  
ATGTATGAAGAGGAGATTAACGAGACCAGAAGGAAGCATGAAACGCGCTTGGTAGAGGTGGATTCTGGG  
C  
GTCAAATTGAGTATGAGTACAAGCTGGCGCAAGCCCTTCATGAGATGAGAGAGCAACATGATGCCAAG  
T  
GAGGCTGTATAAGGAGGAGCTGGAGCAGACTTACCATGCCAAACTTGAGAATGCCAGACTGTCATCAGA  
G  
ATGAATACTTCTACTGTCAACAGTGCCAGGGAAGAACTGATGGAAAGCCGCATGAGAATTGAGAGCCTT  
T  
CATCCAGCTTTCTAATCTACAGAAAGAGTCTAGAGCATGTTTGGAAAGGATTCAAGAATTAGAGGACT  
T  
GCTTGCTAAAGAAAAAGACAACCTCTCGTCGCATGCTGACAGACAAAGAGAGAGAGATGGCGGAAATAAG  
G  
GATCAAATGCAGCAACAGCTGAATGACTATGAACAGCTTCTTGATGTAAAGTTAGCCCTGGACATGGAA  
A  
TCAGTGCTTACAGGAAACTCTTAGAAGGCGAAGAAGAGAGGTTGAAGCTGTCTCCAAGCCCTTCTTCCC  
G  
TGTGACAGTATCCCGAGCATCCTCAAGTCGTAGTGTACGTACAACCTAGAGGAAAGCGGAAGAGGGTTGA

T  
GTGGAAGAATCAGAGGCGAGTAGTAGTGTAGCATCTCTCATTCGCTCAGCCACTGGAAATGTTTGC  
A  
TCGAAGAAATTGATGTTGATGGGAAATTTATCCGCTTGAAGAACACTTCTGAACAGGATCAACCAATGG  
G  
AGGCTGGGAGATGATCAGAAAAATTGGAGACACATCAGTCAGTTATAAATATACCTCAAGATATGTGCT  
G  
AAGGCAGGCCAGACTGTTACAATTTGGGCTGCAAACGCTGGTGTACAGCCAGCCCCCAACTGACCTC  
A  
TCTGGAAGAACCAGAACTCGTGGGGCACTGGCGAAGATGTGAAGGTTATATTGAAAAATTCCTCAGGGAG  
A  
GGAGGTTGCTCAAAGAAGTACAGTCTTTAAAAACAACCATACCTGAAGAAGAGGAGGAGGAGGAAGAAGC  
A  
GCTGGAGTGGTTGTTGAGGAAGAAGTCTTCCACCAGCAGGGAACCCCAAGAGCATCCAATAGAAGCTGT  
G CAATTATGTAA

### K417-LMNB1 sequence

ATGGCGACTGCGACCCCGTGCCGCCGCGGATGGGCAGCCGCGCTGGCGGCCCCACCACGCCGCTGAGC  
C  
CCACGCGCCTGTCGCGGCTCCAGGAGAAGGAGGAGCTGCGCGAGCTCAATGACCGGCTGGCGGTGTACA  
T  
CGACAAGGTGCGCAGCCTGGAGACGGAGAACAGCGCGCTGCAGCTGCAGGTGACGGAGCGCGAGGAGGT  
G  
CGCGGCCGCTGAGCTCACCGCCTCAAGGCGCTCTACGAGACCGAGCTGGCCGACGCGCGACGCGCGCTC  
G  
ACGACACGGCCCGGAGCGCGCCAAGCTGCAGATCGAGCTGGGCAAGTGCAAGGCGGAACACGACCAGC  
T  
GCTCCTCAACTATGCTAAGAAGGAATCTGATCTTAATGGCGCCAGATCAAGCTTCGAGAATATGAAGC  
A  
GCACTGAATTGAAAGATGCAGCTCTTGCTACTGCACTTGGTGACAAAAAAGTTTAGAGGGAGATTTG  
G  
AGGATCTGAAGGATCAGATTGCCAGTTGGAAGCCTCCTTAGCTGCAGCCAAAAAACAGTTAGCAGATG  
A  
AACTTTACTTAAAGTAGATTTGGAGAATCGTTGTCAGAGCCTTACTGAGGACTTGGAGTTTCGCAAAAG  
C  
ATGTATGAAGAGGAGATTAACGAGACCAGAAGGAAGCATGAAACGCGCTTGGTAGAGGTGGATTCTGGG  
C  
GTCAAATTGAGTATGAGTACAAGCTGGCGCAAGCCCTTCATGAGATGAGAGAGCAACATGATGCCAAG  
T  
GAGGCTGTATAAGGAGGAGCTGGAGCAGACTTACCATGCCAAACTTGAGAATGCCAGACTGTCATCAGA  
G  
ATGAATACTTCTACTGTCAACAGTGCCAGGGAAGAACTGATGGAAAGCCGCATGAGAATTGAGAGCCTT  
T  
CATCCAGCTTTCTAATCTACAGAAAGAGTCTAGAGCATGTTTGGAAAGGATTCAAGAATTAGAGGACT  
T  
GCTTGCTAAAGAAAAAGACAACTCTCGTCGCATGCTGACAGACAAAGAGAGAGATGGCGAAATAAG  
G  
GATCAAATGCAGCAACAGCTGAATGACTATGAACAGCTTCTTGATGTAAAGTTAGCCCTGGACATGGAA  
A  
TCAGTGCTTACAGGAAACTCTTAGAAGGCGAAGAAGAGAGGTTGAAGCTGTCTCCAAGCCCTTCTTCCC  
G  
TGTGACAGTATCCCGAGCATCCTCAAGTCGTAGTGTACGTACAACCTAGAGGAAAGCGG **GCC**AGGGTTG

AT

GTGGAAGAATCAGAGGCGAGTAGTAGTGTAGCATCTCTCATTCCGCCTCAGCCACTGGAAATGTTTGC

A

TCGAAGAAATTGATGTTGATGGGAAATTTATCCGCTTGAAGAACACTTCTGAACAGGATCAACCAATGG

G

AGGCTGGGAGATGATCAGAAAAATTGGAGACACATCAGTCAGTTATAAATATACCTCAAGATATGTGCT

G

AAGGCAGGCCAGACTGTTACAATTTGGGCTGCAAACGCTGGTGTACAGCCAGCCCCCAACTGACCTC

A

TCTGGAAGAACCAGAACTCGTGGGGCACTGGCGAAGATGTGAAGGTTATATTGAAAAATTCCTCAGGGAG

A

GGAGGTTGCTCAAAGAAGTACAGTCTTTAAAAACAACCATACCTGAAGAAGAGGAGGAGGAAGAAGC

A

GCTGGAGTGGTTGTTGAGGAAGAACTTTTCCACCAGCAGGGAACCCCAAGAGCATCCAATAGAAGCTGT

G CAATTATGTAA
